# Supplementary material for: Smoking Cessation after Diagnosis of New-Onset Atrial Fibrillation and the Risk of Stroke and Death
Source: MDPI journal article supplement (doi:10.3390/jcm10112238), 2021-05-21
Supplement: s1 [file s1]

# **Supplementary materials**

## **Online Tables**

**Online Table S1. Definitions of covariates**

**Online Table SS2. Hazard ratios of ischemic stroke and all-cause death: unadjusted and model 1**

**Online Table S3. The proportion of patients treated with antiarrhythmic drugs and undergoing AF ablation**

**Online Table S4. Hazard ratios of primary and secondary outcomes after additionally adjusting whether performing early rhythm control by antiarrhythmic drugs or AF catheter ablation**

**Online Table S5. The proportion of patients with obstructive sleep apnea**

**Online Table S6. Hazard ratios of primary and secondary outcomes after additionally adjusting obstructive sleep apnea**

## **Online Figures**

**Online Figure S1. Hazard ratios for the risk of ischemic stroke and all-cause death in sequentially adjusted multivariable models**

**Online Figure S2. Hazard ratios of smoking status on the risk of ischemic stroke and all-cause death in men and women**

**Online Figure S3. Subgroup analyses by age (<65 years, 65 to 74 years, and  $\geq 75$  years) and CHA<sub>2</sub>DS<sub>2</sub>-VASc score (<3 and  $\geq 3$ )**

## Online Tables

### Online Table S1. Definitions of covariates

| Diagnosis                           | ICD-10-CM code and definition                                                                                                                                                                                                                                         | Diagnostic definition                                                                                       |
|-------------------------------------|-----------------------------------------------------------------------------------------------------------------------------------------------------------------------------------------------------------------------------------------------------------------------|-------------------------------------------------------------------------------------------------------------|
| <b>Inclusion/exclusion criteria</b> |                                                                                                                                                                                                                                                                       |                                                                                                             |
| <b>Atrial fibrillation</b>          | I48.0-48.4, I48.9                                                                                                                                                                                                                                                     | Admission $\geq$ 1 or outpatient department $\geq$ 2                                                        |
| <b>Valvular atrial fibrillation</b> | I05.0, I05.2, I05.9, Z95.2-Z95.4                                                                                                                                                                                                                                      | Admission or outpatient department $\geq$ 1                                                                 |
| <b>Ischemic stroke</b>              | I63, I64                                                                                                                                                                                                                                                              | Admission or outpatient department $\geq$ 1                                                                 |
| <b>Comorbidities</b>                |                                                                                                                                                                                                                                                                       |                                                                                                             |
| <b>Hypertension</b>                 | I10-I13, I15; and minimum 1 prescription of anti-hypertensive drug (thiazide, loop diuretics, aldosterone antagonist, alpha-/beta-blocker, calcium-channel blocker, angiotensin-converting enzyme inhibitor, angiotensin II receptor blocker).                        | Admission $\geq$ 1 or outpatient department $\geq$ 2                                                        |
| <b>Diabetes mellitus</b>            | or systolic/diastolic blood pressure $\geq$ 140/90 mmHg<br>E11-E14; and minimum 1 prescription of anti-diabetic drugs (sulfonylureas, metformin, meglitinides, thiazolidinediones, dipeptidyl peptidase-4 inhibitors, $\alpha$ -glucosidase inhibitors, and insulin). | Based on the results of 2 <sup>nd</sup> health exam<br>Admission $\geq$ 1 or outpatient department $\geq$ 2 |
| <b>Dyslipidemia</b>                 | or fasting glucose level $\geq$ 126 mg/dL<br>E78                                                                                                                                                                                                                      | Based on the results of 2 <sup>nd</sup> health exam<br>Admission or outpatient department $\geq$ 1          |
| <b>Heart failure</b>                | or Total cholesterol $\geq$ 240 mg/dL                                                                                                                                                                                                                                 | Based on the results of 2 <sup>nd</sup> health exam                                                         |
| <b>Vascular disease</b>             | I50                                                                                                                                                                                                                                                                   | Admission or outpatient department $\geq$ 1                                                                 |
| <b>Prior MI</b>                     | I21, I22                                                                                                                                                                                                                                                              | Admission or outpatient department $\geq$ 1                                                                 |
| <b>PAD</b>                          | I70, I73                                                                                                                                                                                                                                                              | Admission or outpatient department $\geq$ 2                                                                 |
| <b>CKD</b>                          | eGFR<60ml/min/1.73m <sup>2</sup>                                                                                                                                                                                                                                      | Based on the results of 2 <sup>nd</sup> health exam                                                         |
| <b>COPD</b>                         | J41-44                                                                                                                                                                                                                                                                | Admission $\geq$ 1                                                                                          |
| <b>Cancer</b>                       | C00-97 and RID code (V193)                                                                                                                                                                                                                                            | Admission or outpatient department $\geq$ 1                                                                 |
| <b>Health exam questionnaire</b>    |                                                                                                                                                                                                                                                                       |                                                                                                             |
| <b>Alcohol consumption</b>          | Mild to moderate drinker: alcohol consumption >0g to <30g per day<br>Heavy drinker: alcohol consumption $\geq$ 30g per day                                                                                                                                            | Based on the results of 2 <sup>nd</sup> health exam                                                         |
| <b>Regular exercise</b>             | Performing a moderate physical activity more than 30 minutes at least 5 times per week or strenuous                                                                                                                                                                   | Based on the results of 2 <sup>nd</sup> health exam                                                         |

|                                              |                                                                                                                                                                                                                                             |                                                                              |
|----------------------------------------------|---------------------------------------------------------------------------------------------------------------------------------------------------------------------------------------------------------------------------------------------|------------------------------------------------------------------------------|
|                                              | physical activity more than 20 minutes at least 3 times per week.                                                                                                                                                                           |                                                                              |
| Low income                                   | Income lowest 20% and medical aid                                                                                                                                                                                                           |                                                                              |
| Scores                                       |                                                                                                                                                                                                                                             |                                                                              |
| CHA <sub>2</sub> DS <sub>2</sub> -VASc score | Heart failure (1 point), hypertension (1 point), age ≥75 years (2 points), diabetes (1 point), previous stroke/systemic embolism/transient ischemic attack (2 points), vascular disease (prior MI or PAD, 1 point) and female sex (1 point) |                                                                              |
| Clinical outcome                             |                                                                                                                                                                                                                                             |                                                                              |
| Ischemic stroke                              | I63, I64                                                                                                                                                                                                                                    | Admission≥1 and brain imaging (CT or MRI) ≥1                                 |
| Fatal ischemic stroke                        | I63, I64                                                                                                                                                                                                                                    | Ischemic stroke event that led to death within 30-day of its occurrence      |
| Death from cerebrovascular events            | I60-69                                                                                                                                                                                                                                      | Any cerebrovascular events that led to death within 30-day of its occurrence |

Abbreviation: CKD, chronic kidney disease; COPD, chronic obstructive pulmonary disease; CT, computed tomography; eGFR, estimated glomerular filtration rate; MI, myocardial infarction; MRI, magnetic resonance image; PAD, peripheral artery disease.

**Online Table S2. Hazard ratios of ischemic stroke and all-cause death: unadjusted and model 1**

| <b>Smoking status</b>  | <b>Unadjusted HR (95% CI)</b> | <b>Model 1 HR (95% CI)</b> |
|------------------------|-------------------------------|----------------------------|
| <b>Ischemic stroke</b> | P=0.051                       | P=<0.001                   |
| Never smoker           | 1 (reference)                 | 1 (reference)              |
| Ex-smoker              | 0.959 (0.881-1.044)           | 1.022 (0.917-1.139)        |
| Quitter                | 0.914 (0.789-1.059)           | 1.228 (1.046-1.441)        |
| Current smoker         | 1.102 (0.997-1.218)           | 1.750 (1.551-1.973)        |
| <b>All-cause death</b> | P=<0.001                      | P=<0.001                   |
| Never smoker           | 1 (reference)                 | 1 (reference)              |
| Ex-smoker              | 1.298 (1.215-1.387)           | 1.138 (1.049-1.236)        |
| Quitter                | 1.473 (1.330-1.632)           | 1.831 (1.637-2.048)        |
| Current smoker         | 1.226 (1.310-1.331)           | 1.895 (1.723-2.084)        |

Model 1: age and sex-adjusted

Abbreviation: CI, confidence interval; HR, hazard ratio.

**Online Table S3. The proportion of patients treated with antiarrhythmic drugs and undergoing AF ablation**

|                    | <b>Total<br/>(n=97,637)</b> | <b>Never<br/>smokers<br/>(n=50,036)</b> | <b>Ex-<br/>smokers<br/>(n=26,621)</b> | <b>Quitters<br/>(n=6768)</b> | <b>Current<br/>smokers<br/>(n=14,212)</b> | <b>p-<br/>value</b> |
|--------------------|-----------------------------|-----------------------------------------|---------------------------------------|------------------------------|-------------------------------------------|---------------------|
| <b>AAD use</b>     | 23,409<br>(24.0)            | 11,273<br>(22.5)                        | 7328<br>(27.5)                        | 1760<br>(26.0)               | 3048<br>(21.4)                            | <0.001              |
| <b>Class Ic</b>    | 15,587<br>(16.0)            | 7613<br>(15.2)                          | 4861<br>(18.3)                        | 1033<br>(15.3)               | 2080<br>(14.6)                            | <0.001              |
| <b>Class III</b>   | 8045<br>(8.2)               | 3763<br>(7.5)                           | 2533<br>(9.5)                         | 754<br>(11.1)                | 995<br>(7.0)                              | <0.001              |
| <b>AF ablation</b> | 1145<br>(1.2)               | 477<br>(1.0)                            | 450<br>(1.7)                          | 110<br>(1.6)                 | 108<br>(0.8)                              | <0.001              |

AAD was defined as class Ic and III drugs.

Abbreviation: AAD, antiarrhythmic drugs; AF, atrial fibrillation.

**Online Table S4. Hazard ratios of primary and secondary outcomes after additionally adjusting whether performing early rhythm control by antiarrhythmic drugs or AF catheter ablation**

|                                   | HR (95% CI)         | p-value | HR* (95% CI)        | p-value |
|-----------------------------------|---------------------|---------|---------------------|---------|
| Ischemic stroke                   |                     |         |                     |         |
| Never smoker                      | 1 (reference)       | <0.001  | 0.593 (0.525-0.671) | <0.001  |
| Ex-smoker                         | 1.022 (0.917-1.140) |         | 0.607 (0.541-0.680) |         |
| Quitter                           | 1.191 (1.014-1.399) |         | 0.707 (0.599-0.834) |         |
| Current smoker                    | 1.685 (1.491-1.904) |         | 1 (reference)       |         |
| All-cause death                   |                     |         |                     |         |
| Never smoker                      | 1 (reference)       | <0.001  | 0.585 (0.532-0.645) | <0.001  |
| Ex-smoker                         | 1.112 (1.024-1.206) |         | 0.651 (0.595-0.711) |         |
| Quitter                           | 1.454 (1.299-1.628) |         | 0.851 (0.756-0.958) |         |
| Current smoker                    | 1.708 (1.551-1.881) |         | 1 (reference)       |         |
| Fatal ischemic stroke             |                     |         |                     |         |
| Never smoker                      | 1 (reference)       | <0.001  | 0.452 (0.335-0.612) | <0.001  |
| Ex-smoker                         | 1.063 (0.809-1.396) |         | 0.481 (0.360-0.642) |         |
| Quitter                           | 1.014 (0.651-1.581) |         | 0.459 (0.290-0.726) |         |
| Current smoker                    | 2.211 (1.635-2.989) |         | 1 (reference)       |         |
| Death from cerebrovascular events |                     |         |                     |         |
| Never smoker                      | 1 (reference)       | <0.001  | 0.521 (0.400-0.678) | <0.001  |
| Ex-smoker                         | 1.071 (0.850-1.349) |         | 0.558 (0.434-0.718) |         |
| Quitter                           | 1.290 (0.919-1.809) |         | 0.672 (0.470-0.960) |         |
| Current smoker                    | 1.919 (1.475-2.497) |         | 1 (reference)       |         |

\*HRs are presented the reference group as the current smoker. Abbreviation: AF, atrial fibrillation.

**Online Table S5. The proportion of patients with obstructive sleep apnea**

|     | Total<br>(n=97,637) | Never<br>smokers<br>(n=50,036) | Ex-<br>smokers<br>(n=26,621) | Quitters<br>(n=6768) | Current<br>smokers<br>(n=14,212) | p-<br>value |
|-----|---------------------|--------------------------------|------------------------------|----------------------|----------------------------------|-------------|
| OSA | 361<br>(0.4)        | 133<br>(0.3)                   | 125<br>(0.5)                 | 37<br>(0.5)          | 66<br>(0.5)                      | <0.001      |

Abbreviation: OSA, obstructive sleep apnea.

**Online Table S6. Hazard ratios of primary and secondary outcomes after additionally adjusting obstructive sleep apnea**

|                                   | HR (95% CI)         | p-value | HR* (95% CI)        | p-value |
|-----------------------------------|---------------------|---------|---------------------|---------|
| Ischemic stroke                   |                     |         |                     |         |
| Never smoker                      | 1 (reference)       | <0.001  | 0.591 (0.523-0.668) | <0.001  |
| Ex-smoker                         | 1.022 (0.916-1.139) |         | 0.604 (0.539-0.677) |         |
| Quitter                           | 1.194 (1.017-1.403) |         | 0.706 (0.599-0.832) |         |
| Current smoker                    | 1.692 (1.497-1.912) |         | 1 (reference)       |         |
| All-cause death                   |                     |         |                     |         |
| Never smoker                      | 1 (reference)       | <0.001  | 0.581 (0.528-0.640) | <0.001  |
| Ex-smoker                         | 1.110 (1.023-1.205) |         | 0.645 (0.590-0.705) |         |
| Quitter                           | 1.455 (1.300-1.629) |         | 0.846 (0.752-0.952) |         |
| Current smoker                    | 1.720 (1.562-1.894) |         | 1 (reference)       |         |
| Fatal ischemic stroke             |                     |         |                     |         |
| Never smoker                      | 1 (reference)       | <0.001  | 0.449 (0.332-0.606) | <0.001  |
| Ex-smoker                         | 1.061 (0.808-1.394) |         | 0.476 (0.357-0.635) |         |
| Quitter                           | 1.009 (0.647-1.573) |         | 0.453 (0.286-0.717) |         |
| Current smoker                    | 2.229 (1.649-3.013) |         | 1 (reference)       |         |
| Death from cerebrovascular events |                     |         |                     |         |
| Never smoker                      | 1 (reference)       | <0.001  | 0.516 (0.396-0.671) | <0.001  |
| Ex-smoker                         | 1.068 (0.848-1.346) |         | 0.551 (0.428-0.708) |         |
| Quitter                           | 1.285 (0.916-1.804) |         | 0.663 (0.464-0.947) |         |
| Current smoker                    | 1.940 (1.491-2.523) |         | 1 (reference)       |         |

\*HRs are presented the reference group as the current smoker

## Online Figures



Online Figure S1. Hazard ratios for the risk of ischemic stroke and all-cause death in sequentially adjusted multivariable models

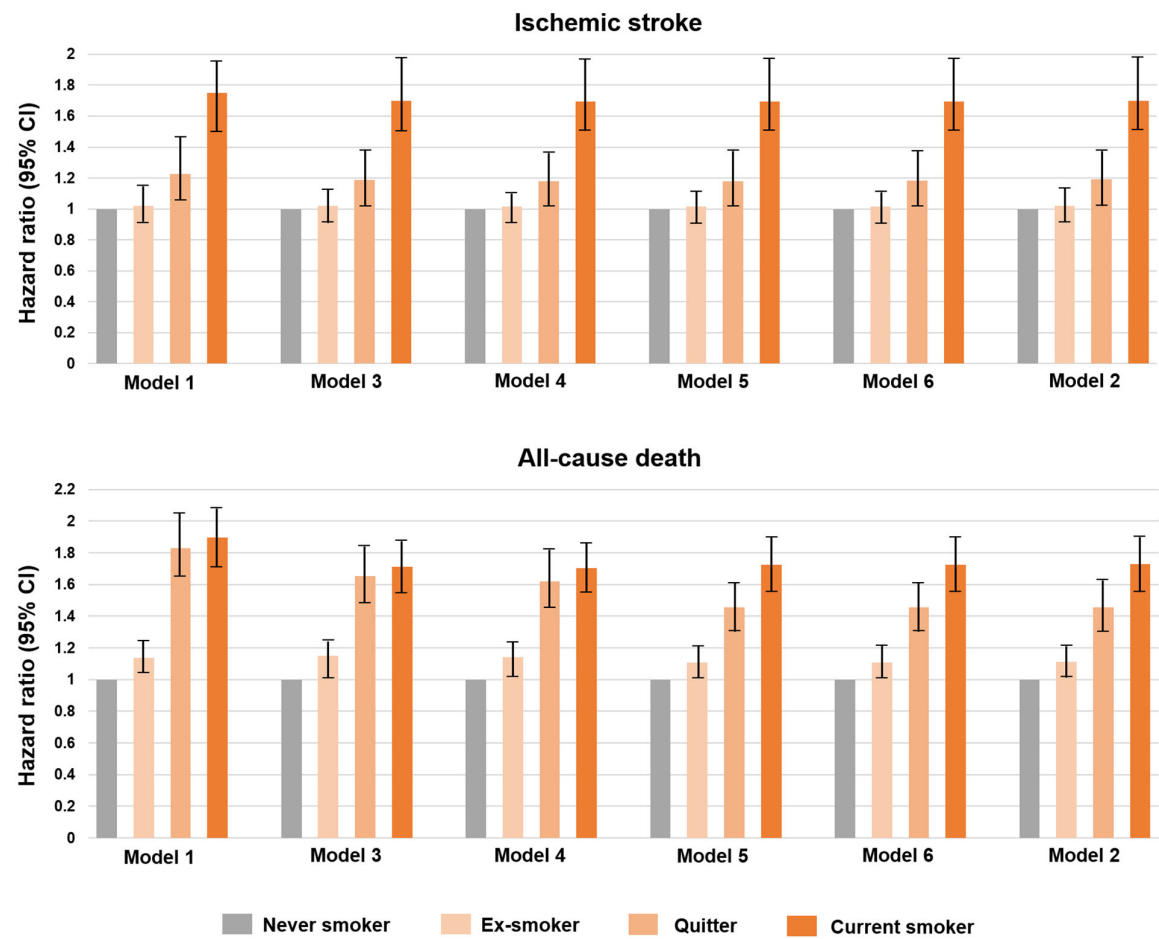

Abbreviation: CI, confidence interval.

Model 1: age and sex

Model 3: age, sex, baseline body mass index, heavy drinker, regular exercise, low income, and CHA<sub>2</sub>DS<sub>2</sub>-VASc score

Model 4: age, sex, baseline body mass index, heavy drinker, regular exercise, low income, comorbidities including hypertension, diabetes mellitus, dyslipidemia,

heart failure, prior myocardial infarction, and peripheral artery disease.

Model 5: model 4 + comorbidities including chronic kidney disease, chronic obstructive pulmonary disease and cancer.

Model 6: model 5 + CHA<sub>2</sub>DS<sub>2</sub>-VASc score

Model 2: model 6 + baseline medications including OACs, aspirin, P2Y<sub>12</sub> inhibitor and statin

Online Figure S2. Hazard ratios of smoking status on the risk of ischemic stroke and all-cause death in men and women

(A) Ischemic stroke

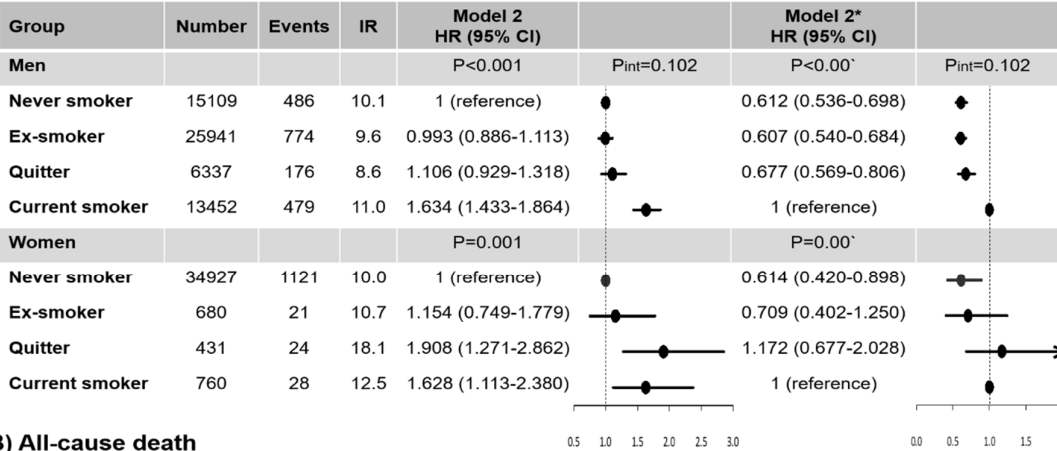

(B) All-cause death

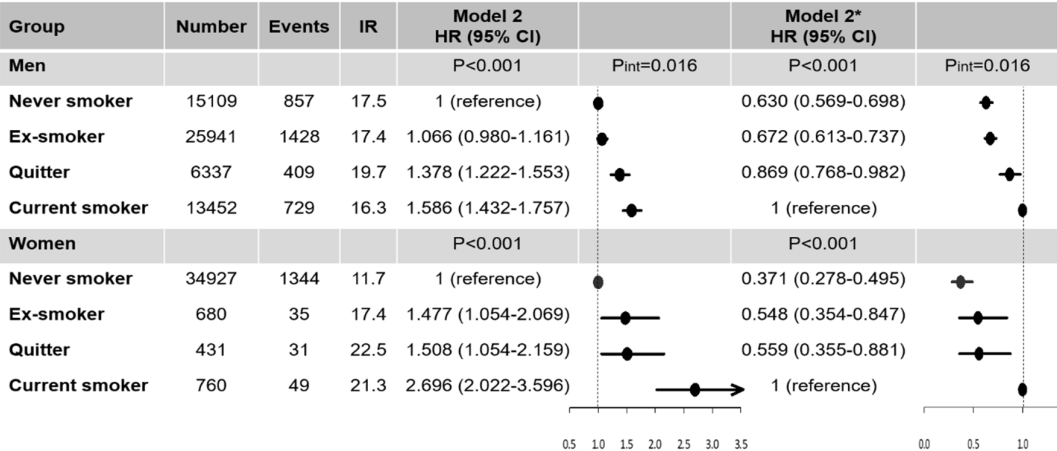

\* With current smokers as the reference group

IR, per 1000 person-years

Abbreviation: CI, confidence interval; HR, hazard ratio; IR, incidence rate; P<sub>int</sub>, p for interaction.

**Online Figure S3. Subgroup analyses by age (<65 years, 65 to 74 years, and ≥75 years) and CHA<sub>2</sub>DS<sub>2</sub>-VASc score (<3 and ≥3)**

**(A) Age**

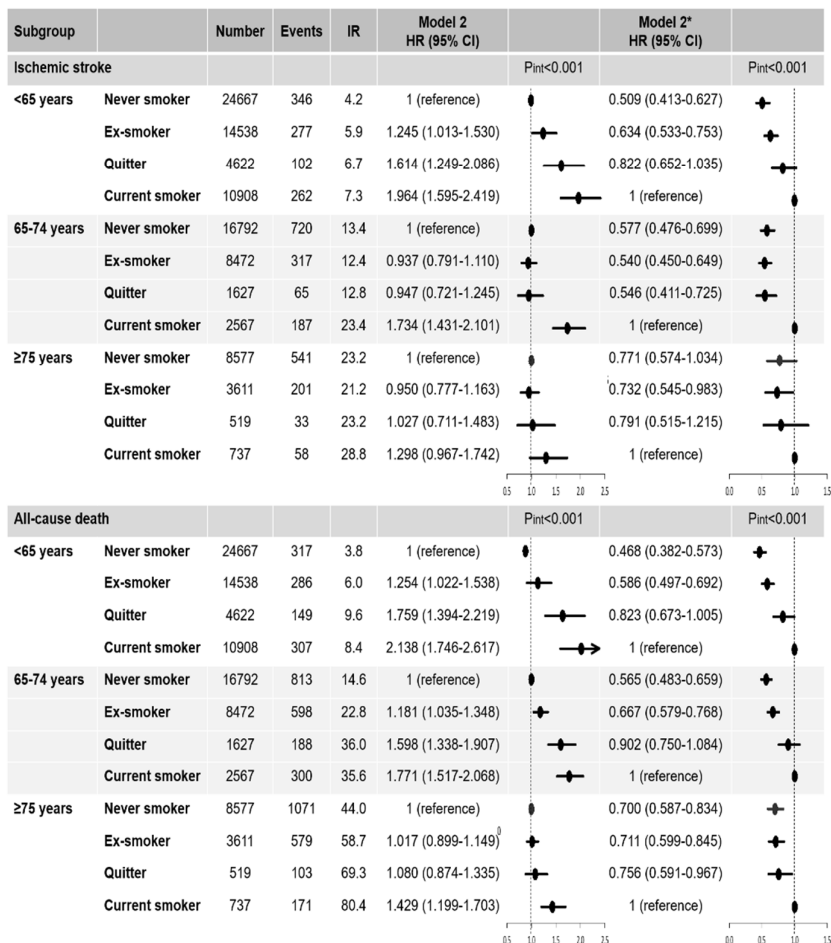

**(B) CHA<sub>2</sub>DS<sub>2</sub>-VASc score**

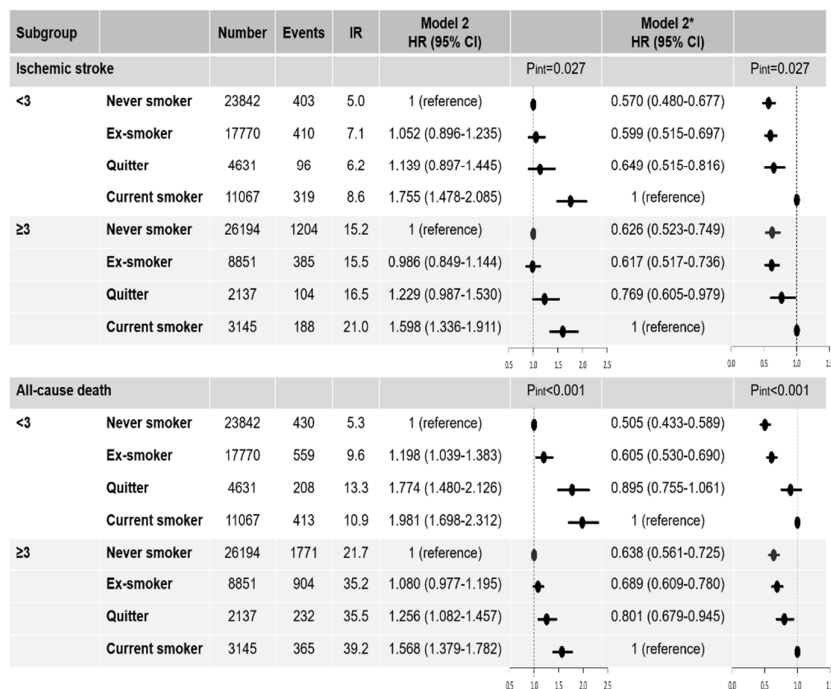

\* With current smokers as the reference group

IR, per 1000 person-years

Abbreviation: CI, confidence interval; HR, hazard ratio; IR, incidence rate; P<sub>int</sub>, p for interaction.
